# Supplementary material for: Phase transition of (CH3)2CHNH3CuCl3: crystal growth, crystal structure, coordination geometry, and molecular motion
Source: Royal Society of Chemistry journal article supplement (doi:10.1039/d5ma00063g), 2025-01-01
Supplement: d5ma00063g1.pdf [file d5ma00063g1.pdf]

### Supplementary Data 3

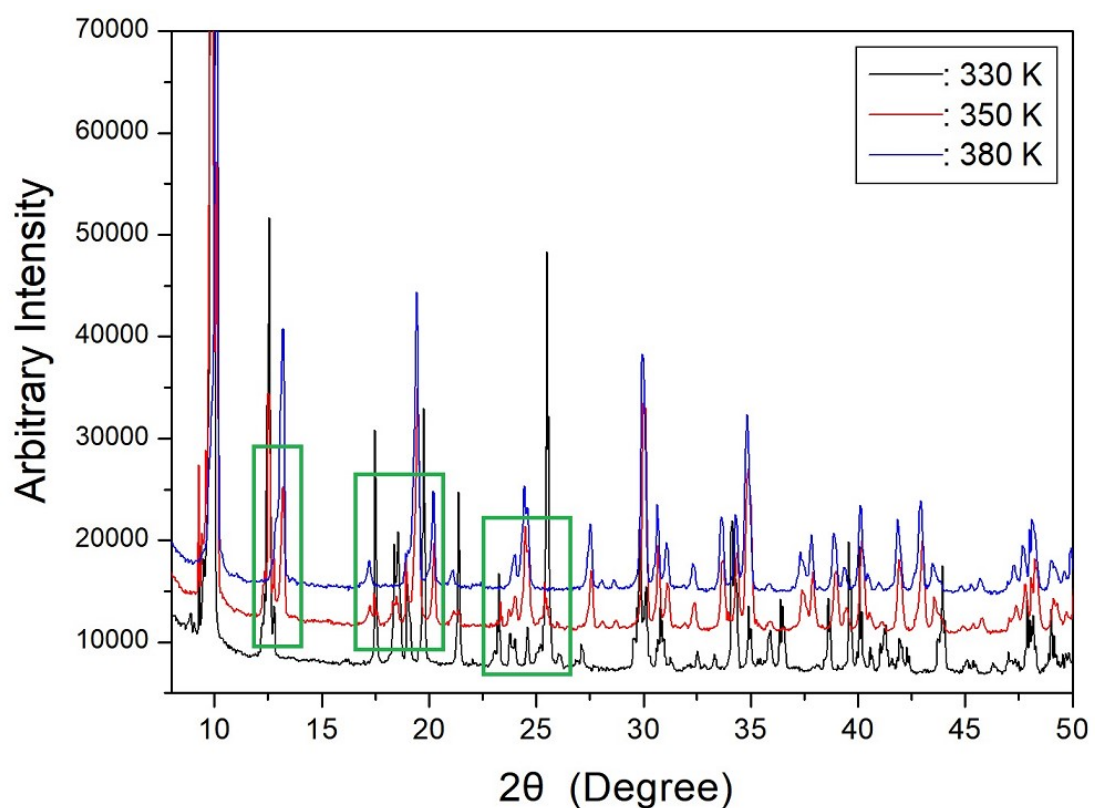

**Figure.** Powder X-ray diffraction patterns of  $(\text{CH}_3)_2\text{CHNH}_3\text{CuCl}_3$  at 330, 350, and 380 K near phase transition temperature.
