# Supplementary material for: Phase transition of (CH3)2CHNH3CuCl3: crystal growth, crystal structure, coordination geometry, and molecular motion
Source: Royal Society of Chemistry journal article supplement (doi:10.1039/d5ma00063g), 2025-01-01
Supplement: d5ma00063g3.pdf [file d5ma00063g3.pdf]

## Supplementary Data 2

### $(\text{CH}_3)_2\text{CHNH}_3\text{CuCl}_3$ (at 350 K)

|                                                                                     |                                                                                      |                                                                                       |
|-------------------------------------------------------------------------------------|--------------------------------------------------------------------------------------|---------------------------------------------------------------------------------------|
| 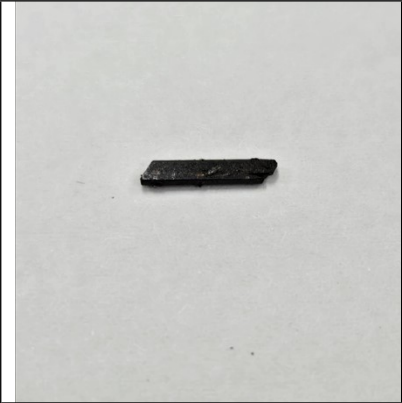   |    |    |
| Morphology at 300 K                                                                 | Morphology at 350 K<br>(Start)                                                       | Morphology at 350 K<br>(1 min passed)                                                 |
|   |   |   |
| Morphology at 350 K<br>(4 min passed)                                               | Morphology at 350 K<br>(7 min passed)                                                | Morphology at 350 K<br>(13 min passed)                                                |
|  |  |  |
| Morphology at 350 K<br>(20 min passed)                                              | Morphology at 350 K<br>(24 min passed)                                               | Morphology at 350 K<br>(28 min passed)                                                |



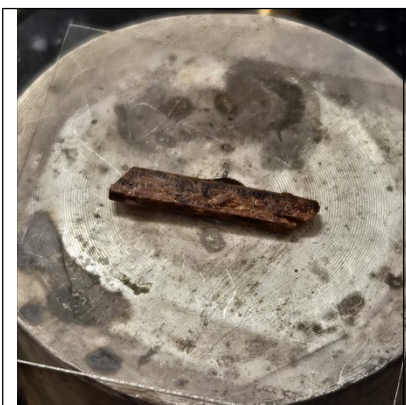

Morphology at 350 K  
(32 min passed)

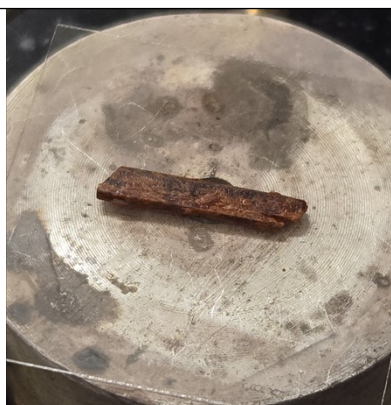

Morphology at 350 K  
(36 min passed)

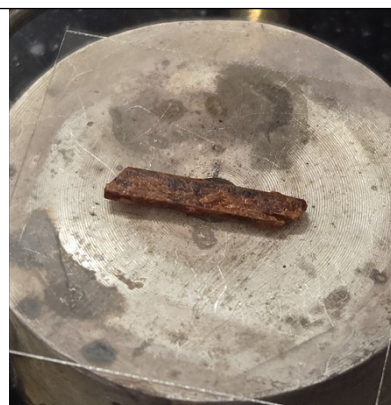

Morphology at 350 K  
(40 min passed)

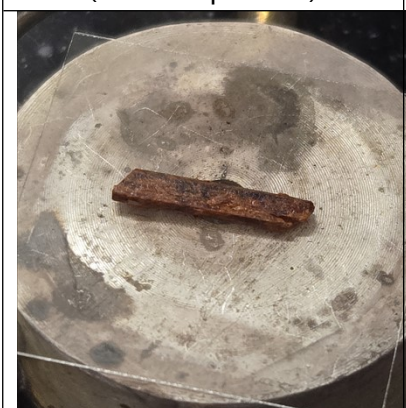

Morphology at 350 K  
(44 min passed)

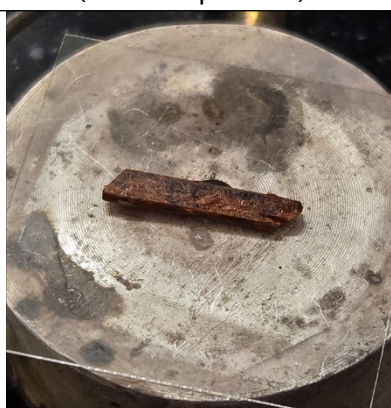

Morphology at 350 K  
(48 min passed)

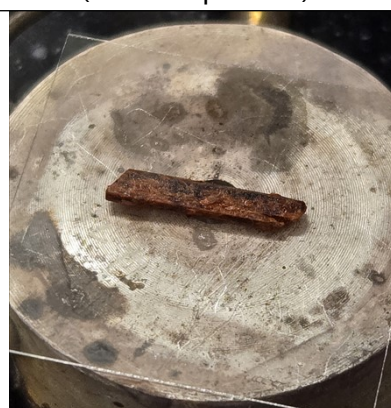

Morphology at 350 K  
(52 min passed)

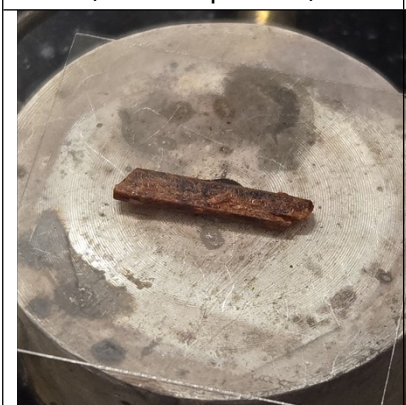

Morphology at 350 K  
(56 min passed)

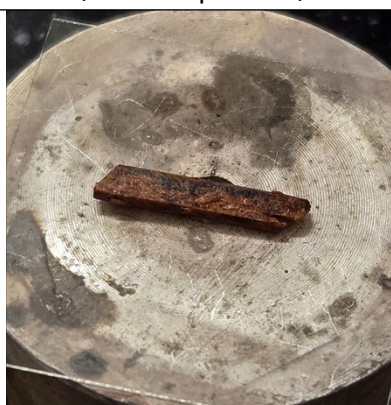

Morphology at 350 K  
(60 min passed)

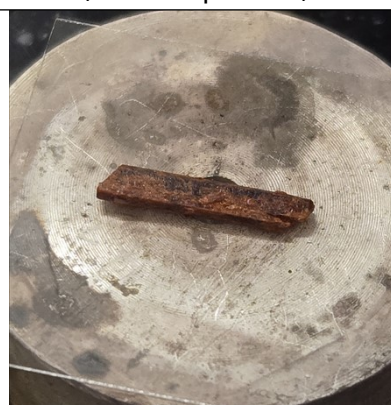

Morphology at 350 K  
(64 min passed)



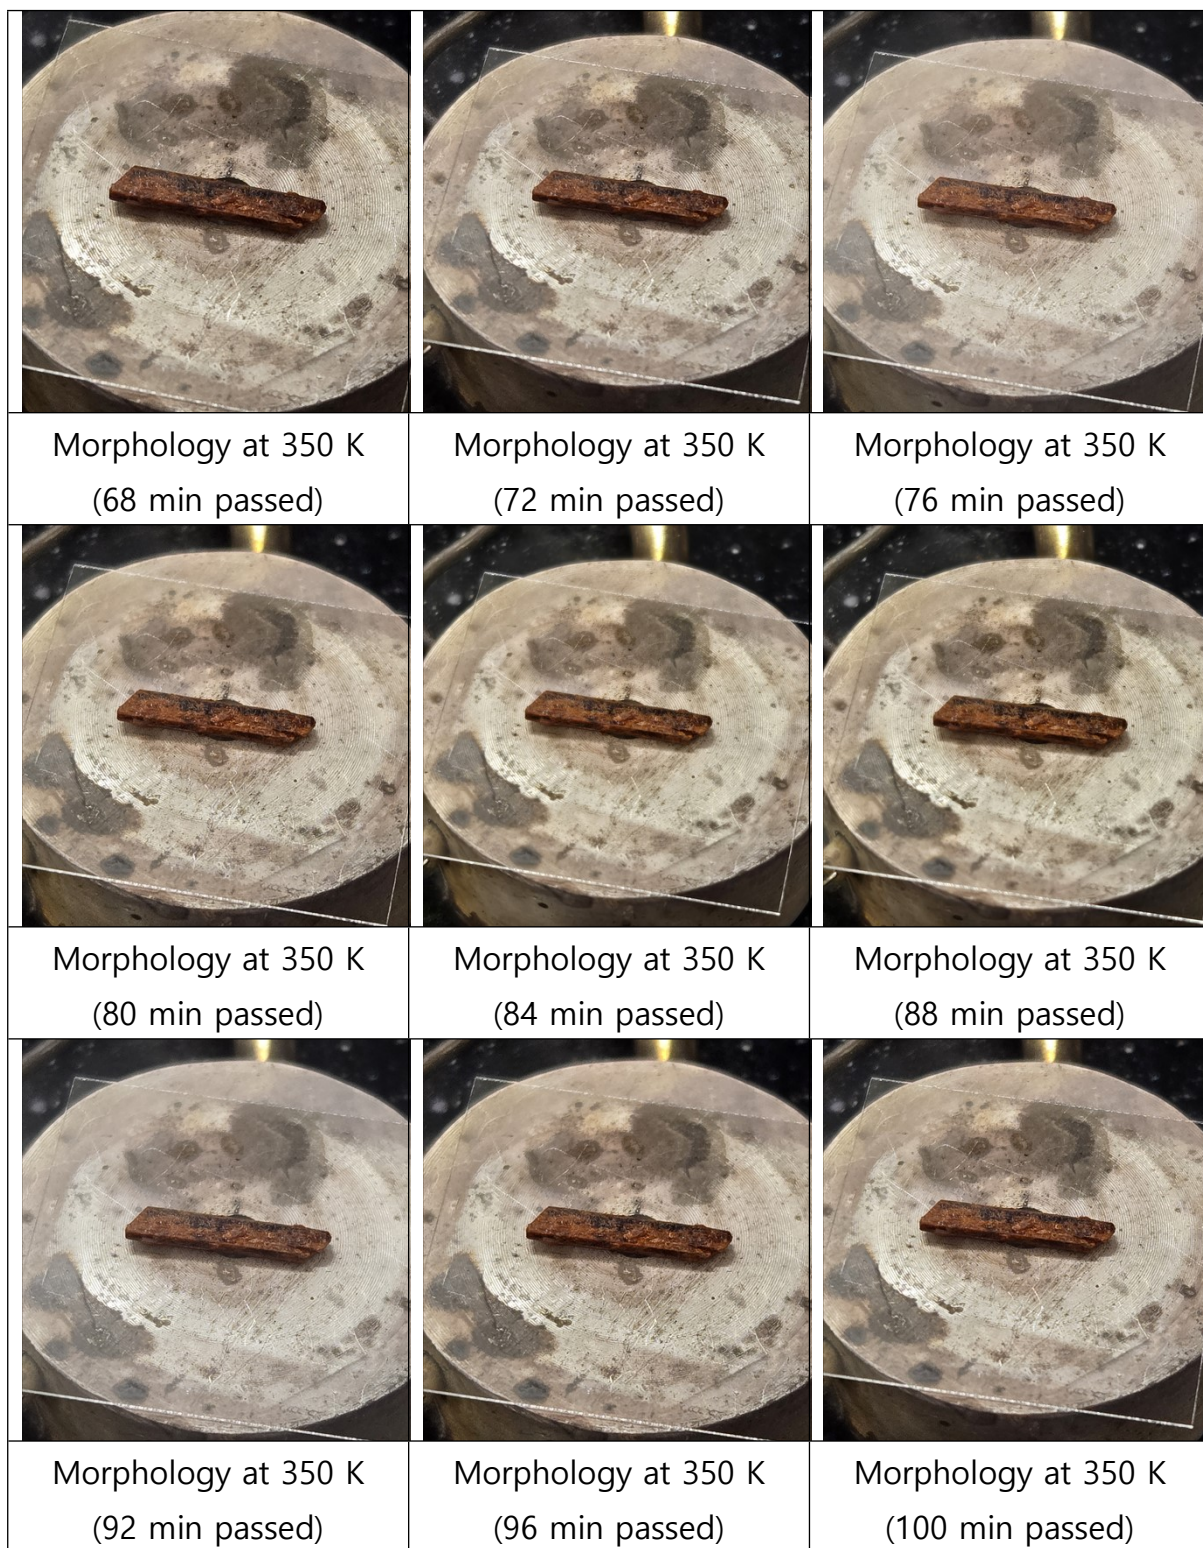

After 1 minute at 350 K, the morphology of the single crystal showed a color change, and no other changes.
