# Supplementary figures and images for: Phase transition of (CH3)2CHNH3CuCl3: crystal growth, crystal structure, coordination geometry, and molecular motion
Source: Royal Society of Chemistry journal article supplement (doi:10.1039/d5ma00063g), 2025-01-01

**Supplementary Data 1**  
**Morphology of a  $(\text{CH}_3)_2\text{CHNH}_3\text{CuCl}_3$  single crystal**

|                                                                                     |                                                                                     |                                                                                      |
|-------------------------------------------------------------------------------------|-------------------------------------------------------------------------------------|--------------------------------------------------------------------------------------|
|    |    |    |
| 300 K                                                                               | 310 K                                                                               | 330 K                                                                                |
|   |   |   |
| 345 K                                                                               | 350 K                                                                               | 370 K                                                                                |
|  |  |  |
| 380 K                                                                               | 410 K                                                                               | 430 K                                                                                |

|                                                                                    |                                                                                    |                                                                                    |
|------------------------------------------------------------------------------------|------------------------------------------------------------------------------------|------------------------------------------------------------------------------------|
| 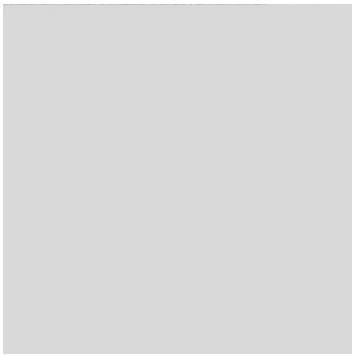  |   |  |
| 460 K                                                                              | 475 K                                                                              | 480 K                                                                              |
|  |  |                                                                                    |
| 490 K                                                                              | 500 K                                                                              |                                                                                    |

Supplement: d5ma00063g2.pdf [file d5ma00063g2.pdf]
